# Supplementary material
Source: PubMed Central journal article supplement (PMC7590951)
Supplement: NIHMS1612222-supplement-Supplemental_Material.pdf [file NIHMS1612222-supplement-Supplemental_Material.pdf]

**SUPPLEMENTARY MATERIAL**

**Supplementary Table 1.** Age standardized transcatheter aortic valve replacement rates from 2011 to 2016 in the state of Florida by population density defined as total population per square mile after excluding uninhabited land (i.e. zero block population).

| Age Group    | Zero Block Population Density per Square Mile | TAVR Utilization by Age Group | 2011–2016 Florida Population by Age Group | 2000 U.S. Standard Population Proportions | Age Standardized Rates* |
|--------------|-----------------------------------------------|-------------------------------|-------------------------------------------|-------------------------------------------|-------------------------|
| <65          | <50                                           | 1                             | 549,296                                   | 0.873614                                  | 0.2                     |
| 65–74        | <50                                           | 5                             | 69,759                                    | 0.066037                                  | 7.2                     |
| 75–84        | <50                                           | 9                             | 36,804                                    | 0.044841                                  | 24.5                    |
| 85+          | <50                                           | 10                            | 12,712                                    | 0.015508                                  | 78.7                    |
| <b>Total</b> | <b>&lt;50</b>                                 | <b>25</b>                     | <b>668,571</b>                            | <b>1.000000</b>                           | <b>2.9</b>              |
| <65          | 50–99                                         | 8                             | 2,277,852                                 | 0.873614                                  | 0.4                     |
| 65–74        | 50–99                                         | 39                            | 286,166                                   | 0.066037                                  | 13.6                    |
| 75–84        | 50–99                                         | 64                            | 149,434                                   | 0.044841                                  | 42.8                    |
| 85+          | 50–99                                         | 45                            | 50,766                                    | 0.015508                                  | 86.7                    |
| <b>Total</b> | <b>50–99</b>                                  | <b>156</b>                    | <b>2,764,218</b>                          | <b>1.000000</b>                           | <b>4.5</b>              |
| <65          | 100–249                                       | 9                             | 4,714,285                                 | 0.873614                                  | 0.2                     |
| 65–74        | 100–249                                       | 62                            | 936,181                                   | 0.066037                                  | 6.6                     |
| 75–84        | 100–249                                       | 189                           | 534,905                                   | 0.044841                                  | 35.3                    |
| 85+          | 100–249                                       | 168                           | 179,558                                   | 0.015508                                  | 93.0                    |
| <b>Total</b> | <b>100–249</b>                                | <b>428</b>                    | <b>6,364,929</b>                          | <b>1.000000</b>                           | <b>3.6</b>              |
| <65          | 250–749                                       | 92                            | 28,719,557                                | 0.873614                                  | 0.3                     |
| 65–74        | 250–749                                       | 293                           | 4,273,495                                 | 0.066037                                  | 6.9                     |
| 75–84        | 250–749                                       | 851                           | 2,474,109                                 | 0.044841                                  | 34.4                    |
| 85+          | 250–749                                       | 779                           | 971,906                                   | 0.015508                                  | 80.2                    |
| <b>Total</b> | <b>250–749</b>                                | <b>2,015</b>                  | <b>36,439,067</b>                         | <b>1.000000</b>                           | <b>3.5</b>              |
| <65          | ≥750                                          | 146                           | 60,174,416                                | 0.873614                                  | 0.2                     |
| 65–74        | ≥750                                          | 471                           | 6,604,679                                 | 0.066037                                  | 7.1                     |

|               |             |              |                    |                 |            |
|---------------|-------------|--------------|--------------------|-----------------|------------|
| 75–84         | ≥750        | 1,466        | 3,886,618          | 0.044841        | 37.7       |
| 85+           | ≥750        | 1,824        | 1,794,811          | 0.015508        | 101.6      |
| <b>Total</b>  | <b>≥750</b> | <b>3,907</b> | <b>72,460,524</b>  | <b>1.000000</b> | <b>4.0</b> |
| <65           | All         | 256          | 96,435,406         | 0.873614        | 0.3        |
| 65–74         | All         | 871          | 12,170,280         | 0.066037        | 7.1        |
| 75–84         | All         | 2,580        | 7,081,870          | 0.044841        | 36.4       |
| 85+           | All         | 2,824        | 3,009,753          | 0.015508        | 93.8       |
| <b>Total*</b> | <b>All</b>  | <b>6,531</b> | <b>118,697,309</b> | <b>1.000000</b> | <b>3.8</b> |

\*The 2000 U.S. Standard Population for calculating the age standardized rates (see <https://seer.cancer.gov/stdpopulations/stdpop.19ages.html>)

**Supplementary Table 2.** Age standardized transcatheter aortic valve replacement rates from 2011 to 2016 in the state of Florida by population density defined as the median population density per square mile.

| Age Group    | Median Density per Square Mile | TAVR Utilization by Age Group | 2011–2016 Florida Population by Age Group | 2000 U.S. Standard Population Proportions | Age Standardized Rates * |
|--------------|--------------------------------|-------------------------------|-------------------------------------------|-------------------------------------------|--------------------------|
| <65          | <250                           | 2                             | 1,148,528                                 | 0.873614                                  | 0.2                      |
| 65–74        | <250                           | 14                            | 143,159                                   | 0.066037                                  | 9.8                      |
| 75–84        | <250                           | 28                            | 75,404                                    | 0.044841                                  | 37.1                     |
| 85+          | <250                           | 30                            | 28,324                                    | 0.015508                                  | 105.9                    |
| <b>Total</b> | <b>&lt;250</b>                 | <b>74</b>                     | <b>1,395,415</b>                          | <b>1.000000</b>                           | <b>4.1</b>               |
| <65          | 250–749                        | 10                            | 2,390,288                                 | 0.873614                                  | 0.4                      |
| 65–74        | 250–749                        | 43                            | 296,453                                   | 0.066037                                  | 14.5                     |
| 75–84        | 250–749                        | 83                            | 150,038                                   | 0.044841                                  | 55.3                     |
| 85+          | 250–749                        | 58                            | 49,970                                    | 0.015508                                  | 114.1                    |
| <b>Total</b> | <b>250–749</b>                 | <b>194</b>                    | <b>2,886,749</b>                          | <b>1.000000</b>                           | <b>5.6</b>               |
| <65          | 750–1,999                      | 32                            | 7,243,037                                 | 0.873614                                  | 0.4                      |
| 65–74        | 750–1,999                      | 88                            | 1,199,743                                 | 0.066037                                  | 7.3                      |
| 75–84        | 750–1,999                      | 309                           | 692,132                                   | 0.044841                                  | 44.6                     |
| 85+          | 750–1,999                      | 248                           | 252,504                                   | 0.015508                                  | 97.8                     |
| <b>Total</b> | <b>750–1,999</b>               | <b>677</b>                    | <b>9,387,416</b>                          | <b>1.000000</b>                           | <b>4.4</b>               |
| <65          | 2,000–3,499                    | 68                            | 25,952,640                                | 0.873614                                  | 0.3                      |
| 65–74        | 2,000–3,499                    | 267                           | 4,358,676                                 | 0.066037                                  | 6.1                      |
| 75–84        | 2,000–3,499                    | 774                           | 2,566,734                                 | 0.044841                                  | 30.2                     |
| 85+          | 2,000–3,499                    | 770                           | 1,008,421                                 | 0.015508                                  | 76.4                     |
| <b>Total</b> | <b>2,000–3,499</b>             | <b>1,879</b>                  | <b>33,886,471</b>                         | <b>1.000000</b>                           | <b>3.2</b>               |
| <65          | ≥3,500                         | 144                           | 59,700,913                                | 0.873614                                  | 0.2                      |
| 65–74        | ≥3,500                         | 458                           | 6,172,249                                 | 0.066037                                  | 7.4                      |

|              |               |              |                    |                 |            |
|--------------|---------------|--------------|--------------------|-----------------|------------|
| 75-84        | ≥3,500        | 1,385        | 3,597,562          | 0.044841        | 38.5       |
| 85+          | ≥3,500        | 1,720        | 1,670,534          | 0.015508        | 103.0      |
| <b>Total</b> | <b>≥3,500</b> | <b>3,707</b> | <b>71,141,258</b>  | <b>1.000000</b> | <b>4.0</b> |
| <65          | All           | 256          | 96,435,406         | 0.873614        | 0.3        |
| 65-74        | All           | 871          | 12,170,280         | 0.066037        | 7.1        |
| 75-84        | All           | 2,580        | 7,081,870          | 0.044841        | 36.4       |
| 85+          | All           | 2,824        | 3,009,753          | 0.015508        | 93.8       |
| <b>Total</b> | <b>All</b>    | <b>6,531</b> | <b>118,697,309</b> | <b>1.000000</b> | <b>3.8</b> |

\* The 2000 U.S. Standard Population for calculating the age standardized rates (see <https://seer.cancer.gov/stdpopulations/stdpop.19ages.html>)

**Supplementary Table 3.** Age standardized transcatheter aortic valve replacement rates from 2011 to 2016 in the state of Florida by population density defined as the 95<sup>th</sup> percentile of population per square mile of land.

| Age Group    | 95th Percentile Density per Square Mile | TAVR Utilization by Age Group | 2011–2016 Florida Population by Age Group | 2000 U.S. Standard Population Proportions | Age Standardized Rates * |
|--------------|-----------------------------------------|-------------------------------|-------------------------------------------|-------------------------------------------|--------------------------|
| <65          | <4,000                                  | 3                             | 1,590,350                                 | 0.873614                                  | 0.2                      |
| 65–74        | <4,000                                  | 30                            | 210,459                                   | 0.066037                                  | 14.3                     |
| 75–84        | <4,000                                  | 48                            | 106,762                                   | 0.044841                                  | 45.0                     |
| 85+          | <4,000                                  | 37                            | 36,366                                    | 0.015508                                  | 101.7                    |
| <b>Total</b> | <b>&lt;4,000</b>                        | <b>118</b>                    | <b>1,943,937</b>                          | <b>1.000000</b>                           | <b>4.7</b>               |
| <65          | 4,000–5,999                             | 23                            | 6,159,481                                 | 0.873614                                  | 0.4                      |
| 65–74        | 4,000–5,999                             | 78                            | 1,183,870                                 | 0.066037                                  | 6.6                      |
| 75–84        | 4,000–5,999                             | 273                           | 689,717                                   | 0.044841                                  | 39.6                     |
| 85+          | 4,000–5,999                             | 218                           | 246,799                                   | 0.015508                                  | 87.9                     |
| <b>Total</b> | <b>4,000–5,999</b>                      | <b>592</b>                    | <b>8,279,867</b>                          | <b>1.000000</b>                           | <b>3.9</b>               |
| <65          | 6,000–7,999                             | 43                            | 12,670,391                                | 0.873614                                  | 0.3                      |
| 65–74        | 6,000–7,999                             | 155                           | 2,413,585                                 | 0.066037                                  | 6.4                      |
| 75–84        | 6,000–7,999                             | 461                           | 1,425,672                                 | 0.044841                                  | 32.3                     |
| 85+          | 6,000–7,999                             | 470                           | 569,421                                   | 0.015508                                  | 82.5                     |
| <b>Total</b> | <b>6,000–7,999</b>                      | <b>1,129</b>                  | <b>17,079,069</b>                         | <b>1.000000</b>                           | <b>3.5</b>               |
| <65          | 8,000–11,999                            | 58                            | 20,103,911                                | 0.873614                                  | 0.3                      |
| 65–74        | 8,000–11,999                            | 199                           | 2,453,266                                 | 0.066037                                  | 8.1                      |
| 75–84        | 8,000–11,999                            | 500                           | 1,371,269                                 | 0.044841                                  | 36.5                     |
| 85+          | 8,000–11,999                            | 429                           | 540,333                                   | 0.015508                                  | 79.2                     |
| <b>Total</b> | <b>8,000–11,999</b>                     | <b>1,186</b>                  | <b>24,468,779</b>                         | <b>1.000000</b>                           | <b>3.7</b>               |
| <65          | ≥12,000                                 | 129                           | 55,911,273                                | 0.873614                                  | 0.2                      |
| 65–74        | ≥12,000                                 | 408                           | 5,909,100                                 | 0.066037                                  | 6.9                      |
| 75–84        | ≥12,000                                 | 1,297                         | 3,488,450                                 | 0.044841                                  | 37.2                     |

|              |                |              |                    |                 |            |
|--------------|----------------|--------------|--------------------|-----------------|------------|
| 85+          | ≥12,000        | 1,672        | 1,616,834          | 0.015508        | 103.4      |
| <b>Total</b> | <b>≥12,000</b> | <b>3,506</b> | <b>66,925,657</b>  | <b>1.000000</b> | <b>3.9</b> |
| <65          | All            | 256          | 96,435,406         | 0.873614        | 0.3        |
| 65–74        | All            | 871          | 12,170,280         | 0.066037        | 7.1        |
| 75–84        | All            | 2,579        | 7,081,870          | 0.044841        | 36.4       |
| 85+          | All            | 2,825        | 3,009,753          | 0.015508        | 93.8       |
| <b>Total</b> | <b>All</b>     | <b>6,531</b> | <b>118,697,309</b> | <b>1.000000</b> | <b>3.8</b> |

\* The 2000 U.S. Standard Population for calculating the age standardized rates (see <https://seer.cancer.gov/stdpopulations/stdpop.19ages.html>)

**Supplementary Table 4.** Multivariable logistic regression analysis examining the association between different definitions of population density on hospital mortality after transcatheter aortic valve replacement in (A) all TAVR; (B) high volume TAVR centers defined as a center performing >50 procedures per year in Florida from 2011 to 2016. Note that the reference group is high-population density areas.

|                             | All TAVR Centers * |         |        |      | High Volume TAVR Center |         |        |      |
|-----------------------------|--------------------|---------|--------|------|-------------------------|---------|--------|------|
|                             | OR <sup>#</sup>    | P Value | 95% CI |      | OR <sup>f</sup>         | P Value | 95% CI |      |
| <b>Total Land **</b>        |                    |         |        |      |                         |         |        |      |
| <50                         | 2.31               | 0.043   | 1.02   | 5.23 | 2.60                    | 0.024   | 1.13   | 5.96 |
| 50 - 99                     | 0.48               | 0.163   | 0.17   | 1.33 | 0.43                    | 0.165   | 0.13   | 1.40 |
| 100 - 249                   | 0.78               | 0.344   | 0.47   | 1.29 | 0.64                    | 0.175   | 0.34   | 1.21 |
| 250 - 749                   | 0.58               | 0.002   | 0.41   | 0.81 | 0.56                    | 0.011   | 0.40   | 0.88 |
| <b>Zero Block †</b>         |                    |         |        |      |                         |         |        |      |
| <50                         | 6.13               | 0.002   | 1.97   | 19.1 | 7.24                    | 0.001   | 2.28   | 23.0 |
| 50 - 99                     | 0.67               | 0.506   | 0.21   | 2.15 | 0.81                    | 0.733   | 0.25   | 2.63 |
| 100 - 249                   | 0.73               | 0.381   | 0.36   | 1.46 | 0.78                    | 0.540   | 0.35   | 1.71 |
| 250 - 749                   | 0.63               | 0.015   | 0.44   | 0.91 | 0.63                    | 0.039   | 0.41   | 0.97 |
| <b>Median ‡</b>             |                    |         |        |      |                         |         |        |      |
| <250                        | 2.12               | 0.158   | 0.74   | 6.02 | 2.50                    | 0.089   | 0.78   | 7.19 |
| 250 - 749                   | 0.87               | 0.774   | 0.35   | 2.18 | 0.63                    | 0.449   | 0.19   | 2.05 |
| 750 - 1,999                 | 0.51               | 0.042   | 0.26   | 0.97 | 0.66                    | 0.232   | 0.33   | 1.29 |
| 2000 - 3,499                | 0.86               | 0.415   | 0.61   | 1.22 | 1.02                    | 0.911   | 0.68   | 1.52 |
| <b>95<sup>th</sup> % ††</b> |                    |         |        |      |                         |         |        |      |
| <4000                       | 0.90               | 0.866   | 0.27   | 2.92 | 1.05                    | 0.929   | 0.32   | 3.44 |
| 4000 - 5,999                | 0.80               | 0.468   | 0.45   | 1.43 | 0.74                    | 0.400   | 0.38   | 1.46 |
| 6000 - 7,999                | 0.78               | 0.273   | 0.50   | 1.21 | 1.03                    | 0.884   | 0.65   | 1.64 |
| 8000 - 11,999               | 0.86               | 0.491   | 0.57   | 1.30 | 0.99                    | 0.980   | 0.59   | 1.65 |

**Abbreviations:** CI = Confidence interval. \*(Reference: >750 people per square mile). \*\*Total land area of the state of Florida by population density measured as people per square miles; † excluding uninhabited land (i.e. excluding blocks with zero inhabitants) (Reference: >3,500 people per square mile); ‡ Median population density per square mile of land; †† 95<sup>th</sup> percentile of population density per square mile of land (Reference: >12,000 people per square mile); # The models were adjusted for age, gender, and elixhauser comorbidity index.
